# Supplementary material for: Unlocking the effect of Li and Ce ions on the thermoluminescence and optically stimulated luminescence signals of the MgB4O7 compound
Source: Royal Society of Chemistry journal article supplement (doi:10.1039/d3dt00485f), 2023-01-01
Supplement: d3dt00485f1.pdf [file d3dt00485f1.pdf]

## Unlocking the effect of Li and Ce ions on the Thermoluminescence and Optically

### Stimulated Luminescence signals of the MgB<sub>4</sub>O<sub>7</sub> compound

João V. B. Batista,<sup>a</sup> Henrique Trombini,<sup>a</sup> André Otsuka,<sup>b</sup> Iury S. Silveira,<sup>c</sup> Linda V. E. Caldas,<sup>c</sup> Antonio O. de Souza,<sup>d</sup> Adelmo S. Souza,<sup>d</sup> Jorge L. O. Santos,<sup>d</sup> Vinicius Coelho<sup>d</sup> and Heveson Lima<sup>e\*</sup>

<sup>a</sup>Departamento de Ciências Exatas e Sociais Aplicadas, Universidade Federal de Ciências da Saúde de Porto Alegre, 90050-170, Porto Alegre, RS, Brazil

<sup>b</sup>Departamento de Física, Universidade Federal de Sergipe, 49100-000, São Cristóvão, SE, Brazil

<sup>c</sup>Instituto de Pesquisas Energéticas e Nucleares, Comissão Nacional de Energia Nuclear, 05508-000, São Paulo, SP, Brazil

<sup>d</sup>Centro Multidisciplinar de Bom Jesus da Lapa, Universidade Federal do Oeste da Bahia, 47600-000, Bom Jesus da Lapa, BA, Brazil

<sup>e</sup>Centro Multidisciplinar de Luís Eduardo Magalhães, Universidade Federal do Oeste da Bahia, 47850-000, Luís Eduardo Magalhães, BA, Brazil

## (A) Defect calculations

**Table S1** – Lattice energy for orthorhombic MgB<sub>4</sub>O<sub>7</sub> and oxide precursors.

| Materials                       | Lattice energies (eV) |
|---------------------------------|-----------------------|
| MgB <sub>4</sub> O <sub>7</sub> | -466.399              |
| MgO                             | -38.785               |
| B <sub>2</sub> O <sub>3</sub>   | -209.248              |
| Ce <sub>2</sub> O <sub>3</sub>  | -128.752              |
| Li <sub>2</sub> O               | -30.512               |

**Table S2** – Intrinsic defect formation energy for isolated defects.

| Defect Energy (eV)    |            |                        |         |                    |
|-----------------------|------------|------------------------|---------|--------------------|
| $V_B'''$              | $V_{Mg}''$ | $V_O^{\bullet\bullet}$ | $Mg'_B$ | $B_{Mg}^{\bullet}$ |
| 82.455                | 24.051     | 31.586                 | 52.730  | -35.965            |
| Interstitial Position |            | $B_i$                  | $Mg_i$  | $O_i$              |
| (4/5,3/5,9/10)        |            | -60.716                | -15.641 | -                  |
| (3/10,3/10,1/10)      |            | -                      | -15.641 | -                  |
| (4/5,3/10,1/3)        |            | -                      | -14.804 | -23.314            |
| (1/5,7/10,3/5)        |            | -49.031                | -15.641 | -10.434            |

**Table S3** – Extrinsic defect formation energy for isolated defects.

| Defect Energy (eV)    |          |            |
|-----------------------|----------|------------|
| $Ce_{Mg}^{\bullet}$   | $Ce_B^x$ | $Li'_{Mg}$ |
| -10.513               | 42.857   | 14.950     |
| Interstitial Position |          | $Ce_i$     |
| (1/3,1/3,1/10)        |          | -23.498    |
| (1/10,6/7,1/3)        |          | -23.501    |
| (2/7,2/7,4/7)         |          | -21.753    |
| (2/3,8/10,4/10)       |          | -23.539    |

There wasn't convergence for Li inserting at B site.
